# Supplementary material for: miR-155 Inhibition Sensitizes CD4+ Th Cells for TREG Mediated Suppression
Source: PubMed Central journal article supplement (PMC2743997; doi:10.1371/journal.pone.0007158), 2009-09-24
Supplement: pone.0007158.s005.pdf [file pone.0007158.s005.pdf]

Supporting Table 1: FoxP3-bound genomic loci with annotated micro-RNAs.

| miRNA      | Chr. | CD4 | CD25 | Location   | Genes associated | Genomic Vizualization (UCSC Browser) | Genomic Vizualization (UCSC Browser) |
|------------|------|-----|------|------------|------------------|--------------------------------------|--------------------------------------|
| mir-1255a  | 4    | +++ | +++  | intragenec | PPP3CA           |                                      |                                      |
| mir-1259   | 20   | +   | +++  | promotor   | ZNFX1, C20ORF199 |                                      |                                      |
| mir-1268   | 15   | +   | +++  | intergenic | -                |                                      |                                      |
| mir-1281   | 22   | +   | +++  | promotor   | EP300            |                                      |                                      |
| mir-1292   | 20   | -   | +++  | promotor   | NOP56            |                                      |                                      |
| mir-1302-2 | 15   | +++ | +++  | promotor   | WASH3P           |                                      |                                      |
| mir-1302-3 | 2    | +++ | +++  | promotor   | WASH2P           |                                      |                                      |

Supporting Table 1: FoxP3-bound genomic loci with annotated micro-RNAs.

| miRNA               | Chr. | CD4 | CD25 | Location                | Genes associated | Genomic Vizualization (UCSC Browser) | Genomic Vizualization (UCSC Browser) |
|---------------------|------|-----|------|-------------------------|------------------|--------------------------------------|--------------------------------------|
| mir-138-2           | 16   | -   | +++  | intergenic              | -                |                                      |                                      |
| mir-141<br>mir-200c | 12   | -   | +++  | intergenic              | -                |                                      |                                      |
| mir-142             | 17   | -   | +++  | intergenic,<br>promotor | BZRAP1           |                                      |                                      |
| mir-146a            | 5    | -   | +++  | intragenec              | -                |                                      |                                      |
| mir-150             | 19   | -   | +++  | intergenic              | -                |                                      |                                      |
| mir-153-1           | 2    | -   | +++  | intragenec              | PTPRN            |                                      |                                      |
| mir-155             | 21   | -   | +++  | intergenic              | -                |                                      |                                      |

Supporting Table 1: FoxP3-bound genomic loci with annotated micro-RNAs.

| miRNA                                                             | Chr. | CD4 | CD25 | Location   | Genes associated | Genomic Vizualization (UCSC Browser) | Genomic Vizualization (UCSC Browser) |
|-------------------------------------------------------------------|------|-----|------|------------|------------------|--------------------------------------|--------------------------------------|
| mir-17<br>mir-18a<br>mir-19a<br>mir-20a<br>mir-19b-1<br>mir-92a-1 | 13   | -   | +++  | intergenic |                  |                                      |                                      |
| mir-21                                                            | 17   | -   | +++  | intergenic |                  |                                      |                                      |
| mir-22                                                            | 17   | +   | +++  | promotor   | C17ORF91         |                                      |                                      |
| mir-23a<br>mir-24-2<br>mir-27a                                    | 19   | -   | +++  | intergenic | -                |                                      |                                      |
| mir-26b                                                           | 2    | +++ | +++  | promotor   | CTDSP1           |                                      |                                      |
| mir-484                                                           | 16   | -   | +++  | promotor   | KIAA0430 NDE1    |                                      |                                      |

Supporting Table 1: FoxP3-bound genomic loci with annotated micro-RNAs.

| miRNA   | Chr. | CD4 | CD25 | Location   | Genes associated | Genomic Vizualization (UCSC Browser) | Genomic Vizualization (UCSC Browser) |
|---------|------|-----|------|------------|------------------|--------------------------------------|--------------------------------------|
| mir-568 | 3    | -   | +++  | intergenic | -                |                                      |                                      |
| mir-607 | 10   | -   | +++  | promotor   | LCOR             |                                      |                                      |
| mir-611 | 11   | -   | ++   | promotor   | FEN1, C11ORF10   |                                      |                                      |
| mir-619 | 12   | -   | +++  | intragenec | SSH1             |                                      |                                      |
| mir-623 | 13   | -   | ++   | intragenec | UBAC2            |                                      |                                      |
| mir-632 | 17   | +   | ++   | promotor   | ZNF207           |                                      |                                      |
| mir-636 | 17   | -   | ++   | promotor   | SFRS2 MFSD11     |                                      |                                      |

Supporting Table 1: FoxP3-bound genomic loci with annotated micro-RNAs.

| miRNA   | Chr. | CD4 | CD25 | Location   | Genes associated | Genomic Vizualization (UCSC Browser) | Genomic Vizualization (UCSC Browser) |
|---------|------|-----|------|------------|------------------|--------------------------------------|--------------------------------------|
| mir-638 | 19   | ++  | +++  | promotor   | DNM2             |                                      |                                      |
| mir-650 | 22   | -   | +++  | intergenic | -                |                                      |                                      |
| mir-760 | 1    | +   | +++  | intergenic |                  |                                      |                                      |
| mir-766 | X    | -   | +++  | intragenec | SEPTIN6          |                                      |                                      |
| mir-923 | 17   | ++  | -    | intragenec | UNC45B           |                                      |                                      |
| mir-933 | 2    | +   | +++  | promotor   | ATF2             |                                      |                                      |
| U8      | 17   | +   | +++  | 3'UTR      | TMEM107          |                                      |                                      |
